# Supplementary material for: A triradical-containing trinuclear Pd(ii) complex: spin-polarized electronic transmission, analog resistive switching and neuromorphic advancements
Source: Royal Society of Chemistry journal article supplement (doi:10.1039/d4mh00928b), 2024-10-23
Supplement: d4mh00928b1.pdf [file d4mh00928b1.pdf]

# A Triradical-Containing Trinuclear Pd(II) Complex: Spin-Polarized Electronic Transmission, Analog Resistive Switching and Neuromorphic Advancements

Prasenjit Sarkar<sup>†1</sup>, Litty Thomas Manamel<sup>†2</sup>, Puranjay Saha<sup>†2</sup>, Chinmay Jana<sup>1</sup>, Amrit Sarmah<sup>3,4</sup>,  
Kannan Udaya Mohanan<sup>5</sup>, Bikas C. Das<sup>\*2</sup>, and Chandan Mukherjee<sup>\*1</sup>

<sup>1</sup> Department of Chemistry, Indian Institute of Technology Guwahati, Guwahati, 781039, Assam, India

<sup>2</sup> eNDR Laboratory, School of Physics, IISER Thiruvananthapuram, Vithura, Trivandrum 695551, Kerala, India

<sup>3</sup> Department of Molecular Modelling, Institute of Organic Chemistry and Biochemistry ASCR, v.v.i. Flemingovo nám. 2, CZ-166 10 Prague 6, Czech Republic

<sup>4</sup> Regional Centre of Advanced Technologies and Materials, Faculty of Science, Palacký University Olomouc, 78371 Olomouc, Czech Republic

<sup>5</sup> School of Electrical Engineering and Computer Science, University of Ottawa, Ottawa, ON K1N 6N5, Canada

## Corresponding Authors:

\*<sup>1</sup> Prof. Chandan Mukherjee, E-mail: cmukherjee@iitg.ac.in

\*<sup>2</sup> Bikas C. Das, Email: bikas@iisertvm.ac.in

† Authors contributed equally to this work.

## ORCID iDs

Chandan Mukherjee: <https://orcid.org/0000-0002-2771-2468>

Bikas C Das: <https://orcid.org/0000-0002-4750-0542>

| <b>Contents</b>                                                                                                                                                     | <b>Page</b> |
|---------------------------------------------------------------------------------------------------------------------------------------------------------------------|-------------|
| Scheme for the synthesis of the ligand                                                                                                                              | S3          |
| Infrared spectrum of complex <b>1</b>                                                                                                                               | S3          |
| ESI (+ve) mass spectrum for complex <b>1</b>                                                                                                                        | S4          |
| UV-Vis-NIR and EPR spectra of complex <b>1</b> and its oxidized species                                                                                             | S4          |
| ORTEP diagram of complex <b>1</b>                                                                                                                                   | S5          |
| Thickness measurement of complex <b>1</b>                                                                                                                           | S5          |
| <i>I-V</i> sweeps in a loop of varying $\pm V_{\max}$                                                                                                               | S6          |
| <i>I-V</i> characteristics in 10 consecutive loops in positive (–1.0 V to + 1.0 V) and negative (+ 1.0 V to – 1.0 V) bias sweep direction                           | S6          |
| <i>I-V</i> characteristics in multiple loops for four different devices                                                                                             | S7          |
| Cumulative probability plots of $I_{\text{SET}}$ and $I_{\text{RESET}}$ currents and Weibull distribution plots of $I_{\text{SET}}$ and $I_{\text{RESET}}$ currents | S8          |
| ReRAM applicability of the devices                                                                                                                                  | S9          |
| EPSC response using read pulses of +0.1 V, 1 ms with 1 ms intervals, after applying a pre-synaptic pulse of +1.0 V, 10 ms                                           | S9          |
| <b>Table S1:</b> Selected bond distances(Å) and bond angles(°) of complex <b>1</b>                                                                                  | S10         |
| <b>Table S2:</b> Crystallographic parameters and refinement data for complex <b>1</b>                                                                               | S11         |
| <b>Table S3:</b> Statistical measures and Weibull distribution results of the $I_{\text{SET}}$ and $I_{\text{RESET}}$ currents of different memristor devices       | S11         |
| <b>Table S4:</b> Performance comparison of complex <b>1</b> as a memristor material                                                                                 | S12-S13     |
| Optimized coordinates of complex <b>1</b>                                                                                                                           | S13-S16     |

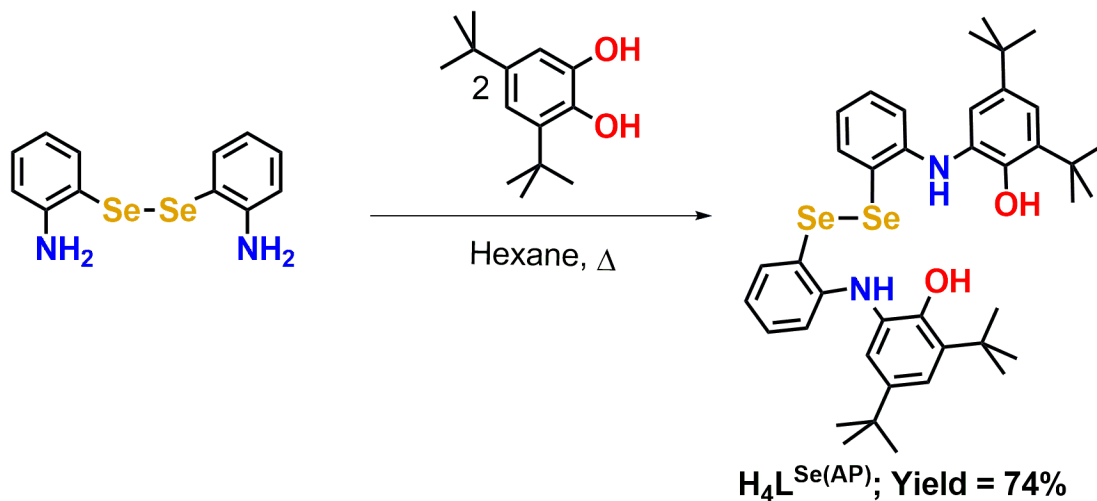

**Scheme 1.** Synthesis route to the ligand.

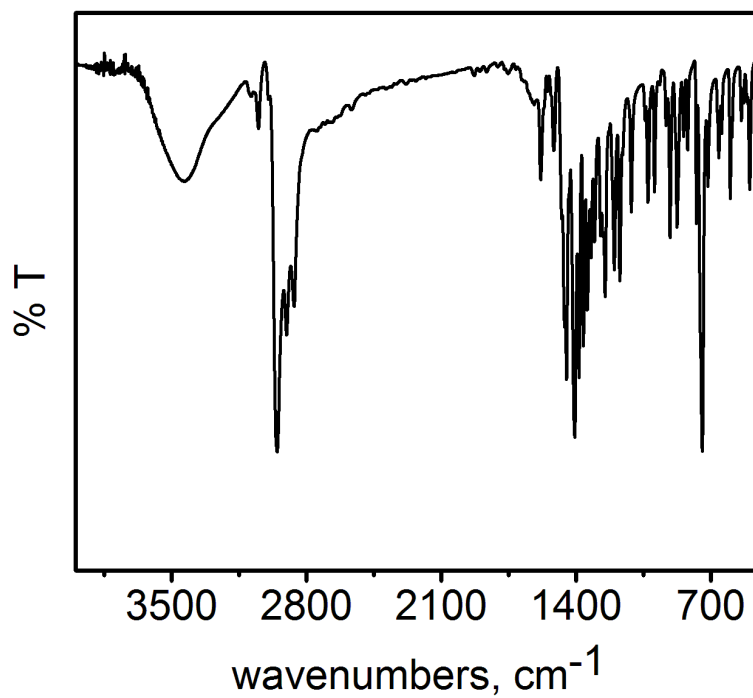

**Figure S1.** Infrared spectrum of complex **1**.

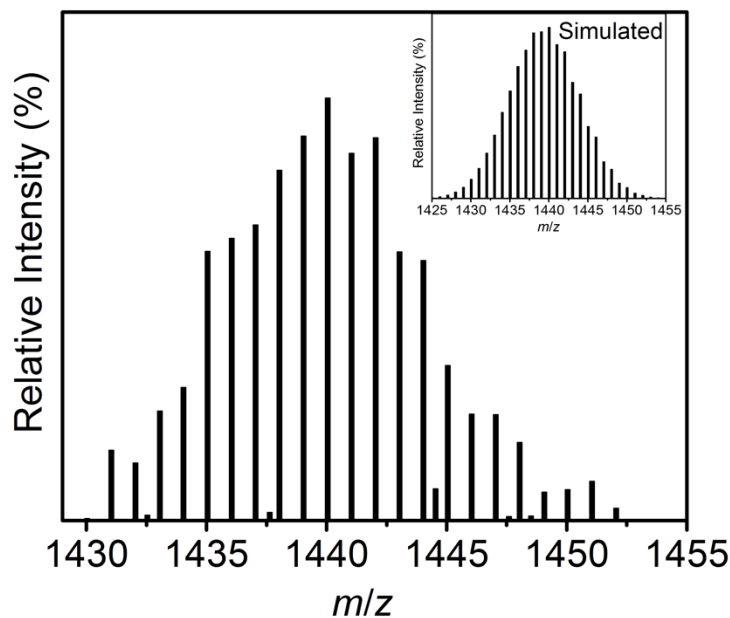

**Figure S2.** Experimental and simulated mass spectra for complex **1** =  $[\text{C}_{60}\text{H}_{72}\text{N}_3\text{O}_3\text{Se}_3\text{Pd}_3 + \text{H}]^+$  have been shown.

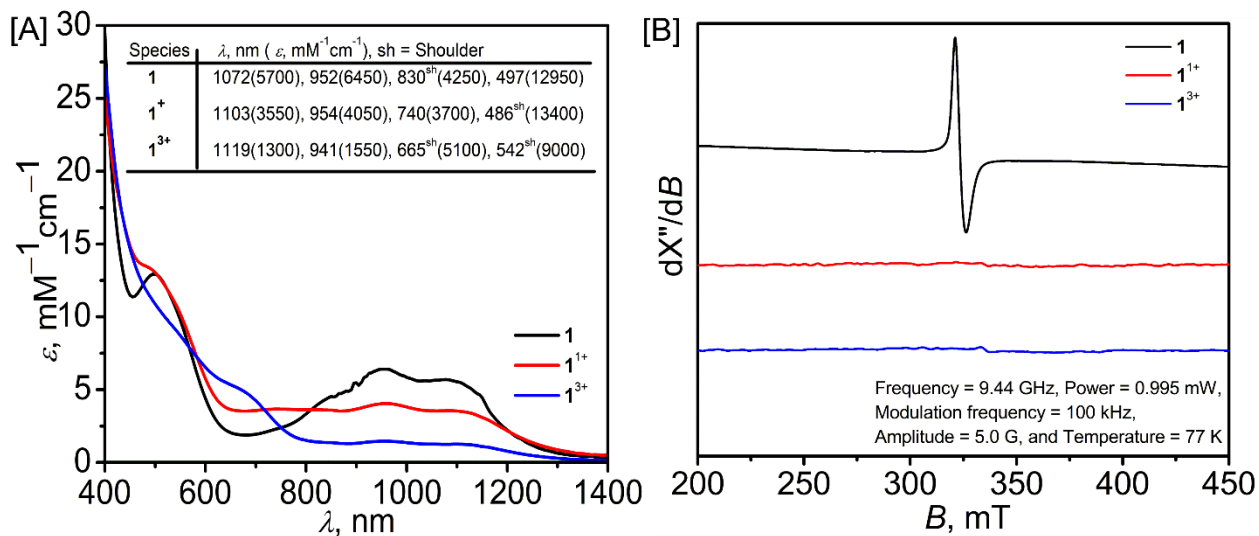

**Figure S3.** [A]: UV-vis-NIR spectra of complex **1** and its one- and three-electron oxidized species at room temperature in  $\text{CH}_2\text{Cl}_2$  and [B] X-band EPR spectra for the species in  $\text{CH}_2\text{Cl}_2$ .

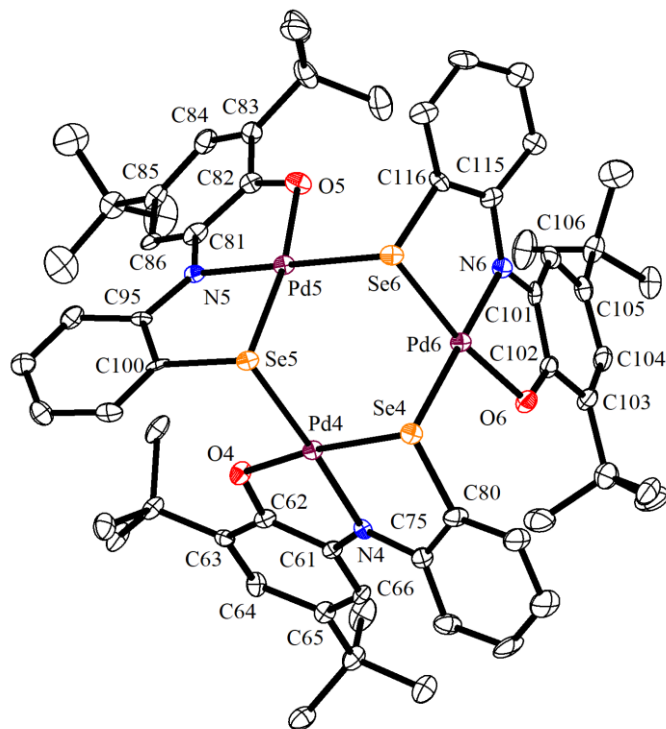

**Figure S4.** ORTEP diagram of complex **1** (one unit) at 40% probability level. (H atoms are omitted for clarity).

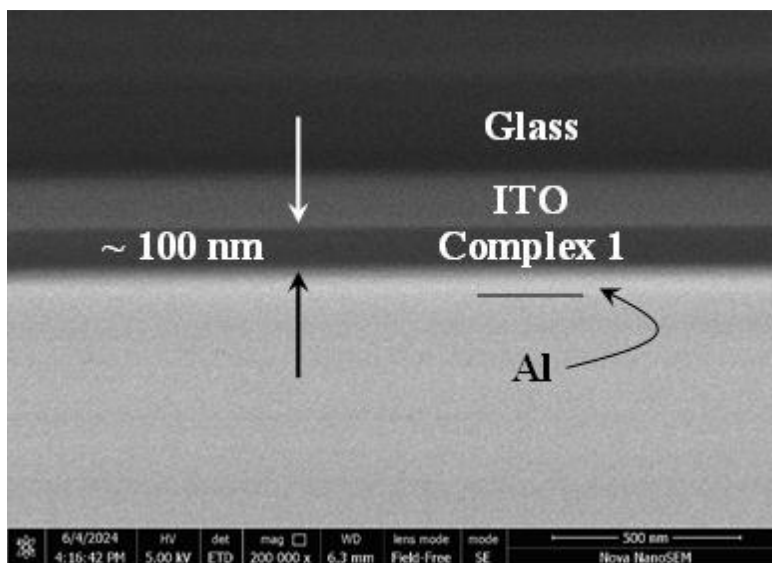

**Figure S5.** The cross-sectional SEM image of ITO/complex **1**/Al cross-bar memristor device with an average active layer thickness of about 100 nm.

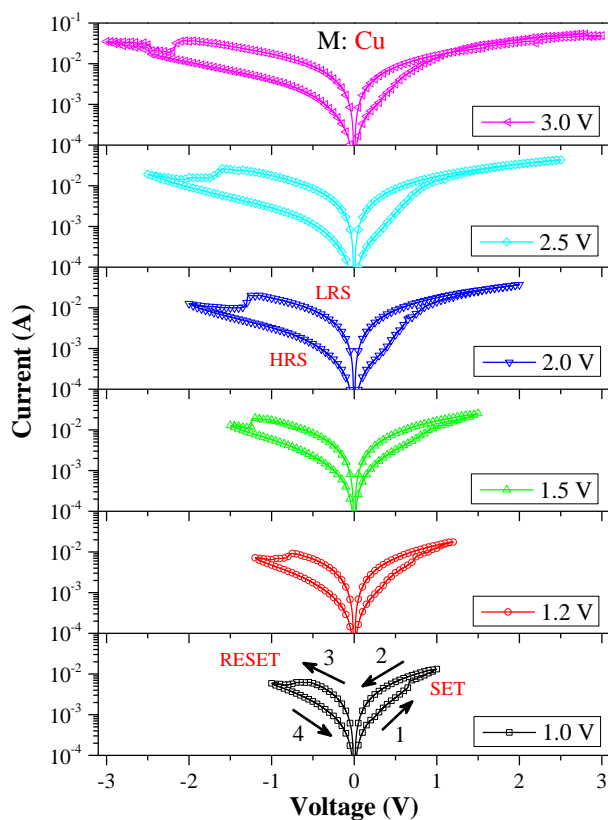

**Figure S6.**  $I$ - $V$  sweeps in a loop of varying  $\pm V_{\max}$  showing distinct  $I_{\text{On}}$  (low resistive state, LRS) and  $I_{\text{Off}}$  (high resistive state, HRS).

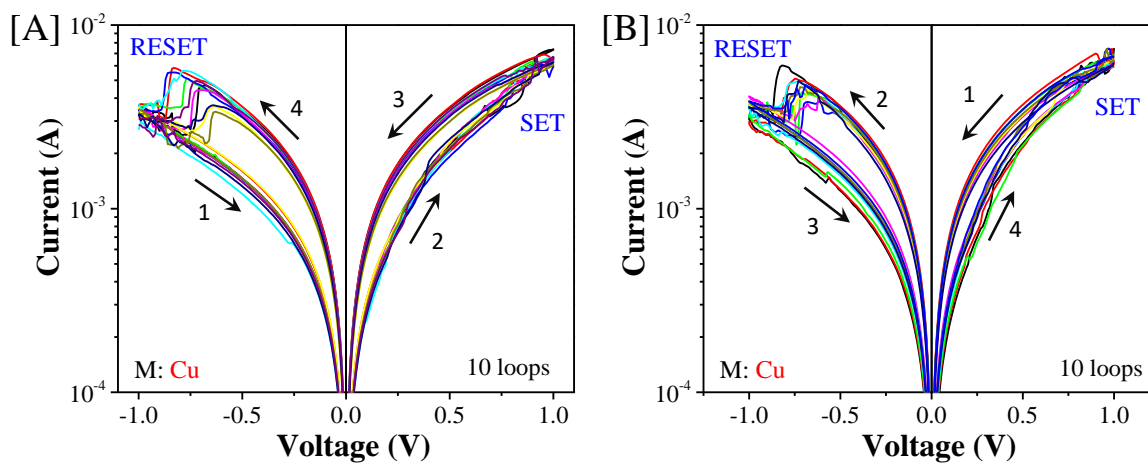

**Figure S7.** [A and B]  $I$ - $V$  characteristics in 10 consecutive loops in positive ( $-1.0$  V to  $+ 1.0$  V) and negative ( $+ 1.0$  V to  $- 1.0$  V) bias sweep direction, respectively.

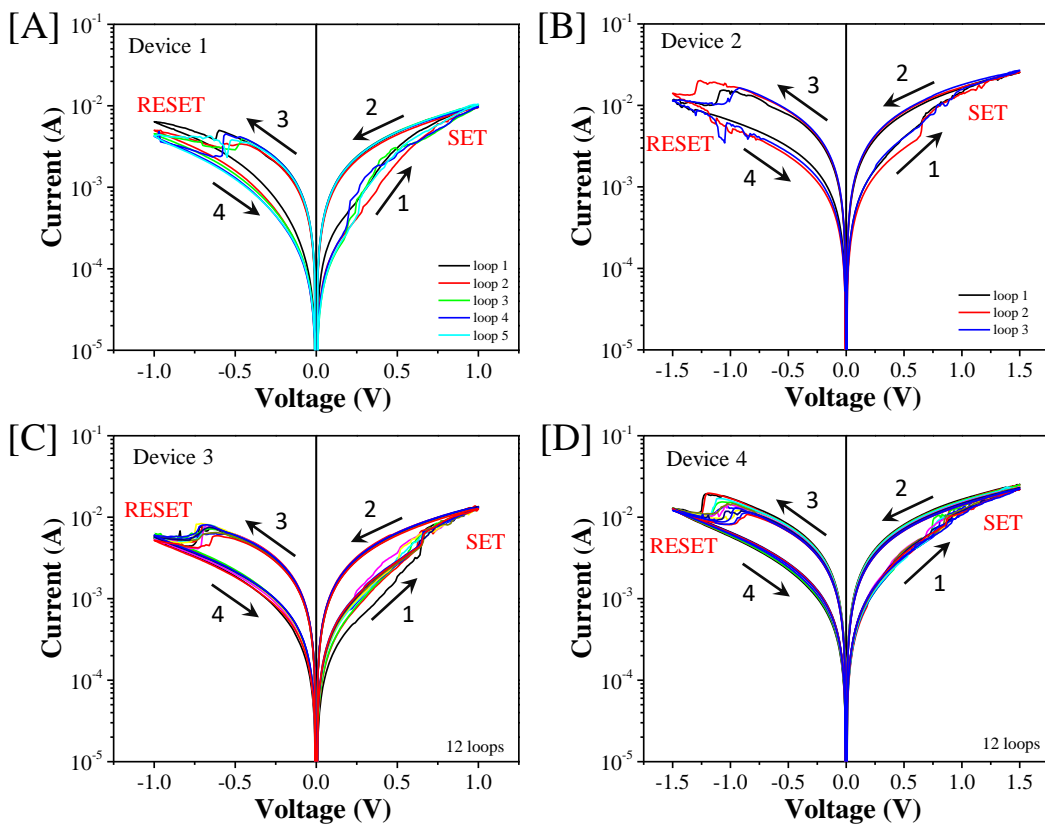

**Figure S8.** [A - D]  $I$ - $V$  characteristics in multiple loops for four different devices arbitrarily picked from the 16 fabricated devices.

### Section S1:

We performed various control experiments to establish the robustness of our complex **1** for showing resistive switching properties and relevant ReRAM performance. Figures S7 [A] and S7[B] represent  $I$ - $V$  curves in 10 consecutive loops between  $\pm 1.0$  V for the ITO/(complex **1**:PMMA)/Cu device in sweep direction  $-1.0$  V to  $+1.0$  V (positive) and  $+1.0$  V to  $-1.0$  V (negative), respectively. These results unambiguously depict the sweeping direction independent RS property of complex **1**. Next, we have recorded  $I$ - $V$  curves in multiple loops for four arbitrarily picked devices from 16 devices by sweeping voltage starting from 0 V to  $+V_{\max}$  to  $-V_{\max}$  to 0 V again as illustrated in Figure S8 [A–D]. Note that  $V_{\max}$  is considered as 1.0 V (for devices 1 and 3) or 1.5 V (for devices 2 and 4). Interestingly, all the  $I$ - $V$  curves look very consistent for gradual transformation from the HRS to LRS with the increase of bias towards positive polarity, which is known as the SET process. The RESET process is observed in the negative polarity of applied bias

voltage transiting from the LRS to HRS with a negative differential resistance (NDR) peak. Therefore, the complex **1** molecule robustly displayed the stable memristor property independent of the top metal electrode (Al or Cu), voltage sweep directions, and number of cycles. Eventually, the memristor performance is quite stable in cycle-to-cycle and device-to-device variation. Not only that, we can claim the consistency of the RS property of complex **1** in different batches of device fabrication too.

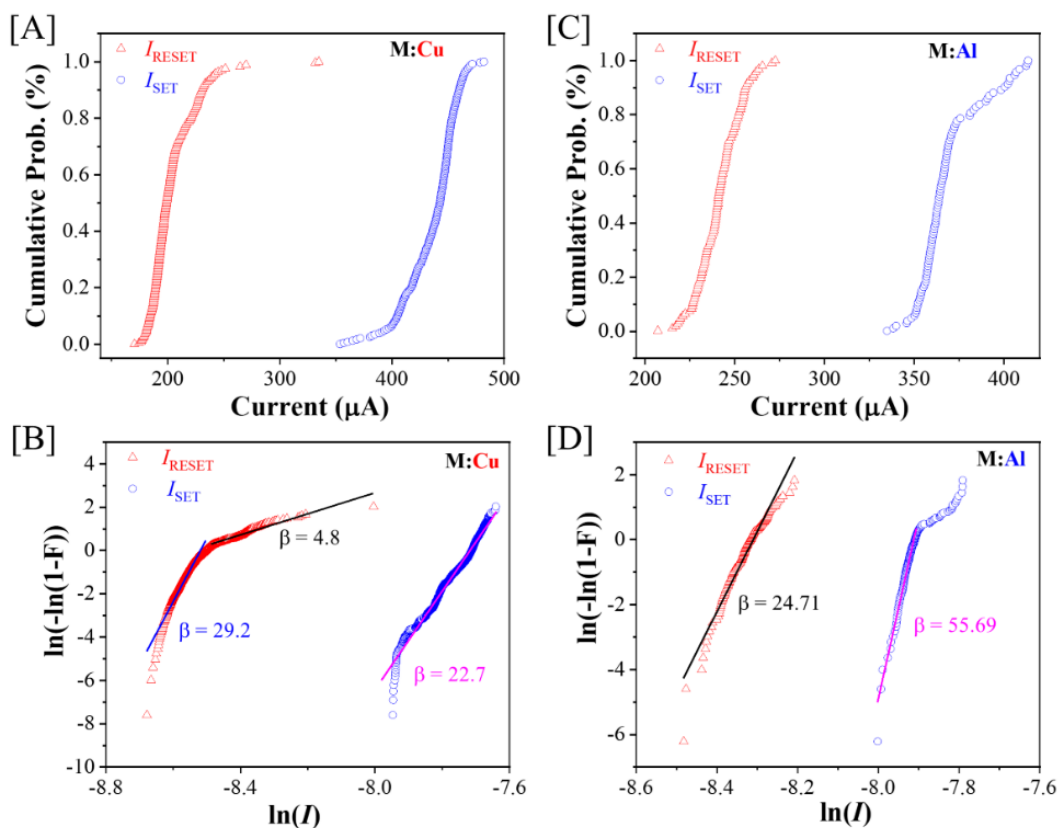

**Figure S9.** [A and B] Cumulative probability plots of  $I_{SET}$  and  $I_{RESET}$  currents measured over 1300 cycles for the Cu top electrode device and 550 cycles for the Al top electrode device, respectively. [C and D] Weibull distribution plots of  $I_{SET}$  and  $I_{RESET}$  currents corresponding to the data in [A and B], respectively.



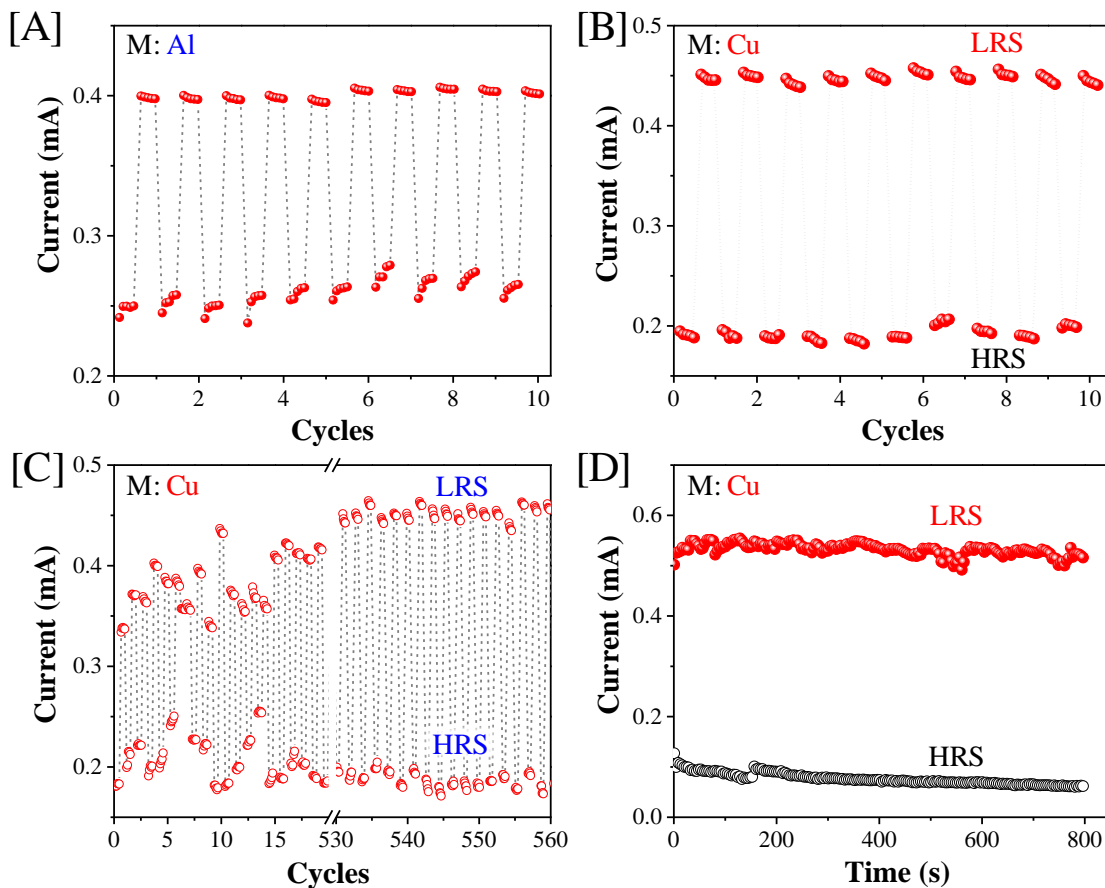

**Figure S10.** [A] ReRAM application for 10 W/R/E/R cycles for the ITO/(complex **1**:PMMA)/Al device. [C - D] ReRAM, endurance of 560 cycles, and retention of states (HRS and LRS) for more than 800 s, respectively, for the ITO/(complex **1**:PMMA)/Cu device.

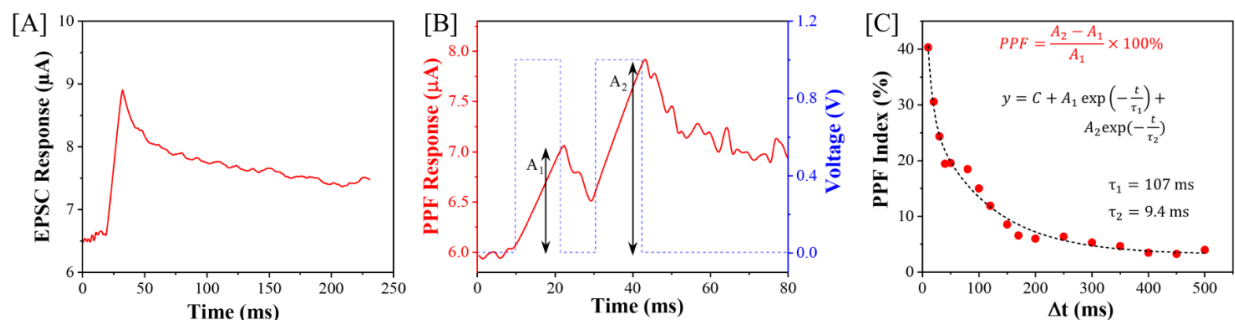

**Figure S11.** [A] EPSC response was recorded using read pulses of +0.1 V, 1 ms with 1 ms intervals, after applying a pre-synaptic pulse of +1.0 V, 10 ms. [B] A paired-pulse (+1.0 V, 10 ms) with a 10 ms interval was applied to the pre-synaptic terminal (blue dashed line), and the paired-

pulse facilitation (PPF) response (red solid line) was recorded at the post-synaptic terminal using read voltage pulses of +0.1 V, 1ms with 1 ms intervals. [C] The PPF index was plotted against varying time intervals ( $\Delta t$ ) between the paired pulses applied to the pre-synaptic terminal.

**Table S1:** Selected bond distances( $\text{\AA}$ ) and bond angles ( $^\circ$ ) of complex **1**.

| Atoms       | Experimental | Calculated | Atoms      | Experimental | Calculated |
|-------------|--------------|------------|------------|--------------|------------|
| Pd4–N4      | 2.007(4)     | 2.039      | C102–O6    | 1.302(7)     | 1.309      |
| Pd4–O4      | 2.036(3)     | 2.087      | C61–C62    | 1.433(8)     | 1.459      |
| Pd4–Se4     | 2.3587(7)    | 2.465      | C62–C63    | 1.444(7)     | 1.441      |
| Pd4–Se5     | 2.4061(7)    | 2.500      | C63–C64    | 1.372(8)     | 1.391      |
| Pd5–N5      | 2.011(4)     | 2.040      | C64–C65    | 1.424(8)     | 1.429      |
| Pd5–O5      | 2.043(4)     | 2.087      | C65–C66    | 1.364(7)     | 1.388      |
| Pd5–Se5     | 2.3527(7)    | 2.464      | C66–C61    | 1.427(7)     | 1.421      |
| Pd5–Se6     | 2.4080(7)    | 2.501      | C81–C82    | 1.448(8)     | 1.460      |
| Pd6–N6      | 1.993(4)     | 2.040      | C82–C83    | 1.436(7)     | 1.441      |
| Pd6–O6      | 2.038(4)     | 2.086      | C83–C84    | 1.346(8)     | 1.391      |
| Pd6–Se6     | 2.3678(7)    | 2.462      | C84–C85    | 1.436(8)     | 1.429      |
| Pd6–Se4     | 2.4099(7)    | 2.499      | C85–C86    | 1.361(8)     | 1.388      |
| C80–Se4     | 1.933(6)     | 1.971      | C86–C81    | 1.421(7)     | 1.421      |
| C100–Se5    | 1.925(6)     | 1.971      | C101–C102  | 1.452(8)     | 1.459      |
| C116–Se6    | 1.935(6)     | 1.972      | C102–C103  | 1.444(8)     | 1.441      |
| C61–N4      | 1.381(6)     | 1.377      | C103–C104  | 1.370(8)     | 1.391      |
| C81–N5      | 1.368(7)     | 1.376      | C104–C105  | 1.412(8)     | 1.429      |
| C101–N6     | 1.352(7)     | 1.377      | C105–C106  | 1.363(8)     | 1.389      |
| C62–O4      | 1.310(6)     | 1.309      | C106–C101  | 1.417(8)     | 1.421      |
| C82–O5      | 1.301(6)     | 1.308      |            |              |            |
| Se4–Pd4–Se5 | 92.89(2)     | 95.11      | N5–Pd5–Se5 | 87.89(12)    | 87.12      |
| O4–Pd4–Se5  | 97.54(11)    | 96.87      | N5–Pd5–Se6 | 179.19(13)   | 176.94     |
| O4–Pd4–Se4  | 168.87(11)   | 167.92     | N5–Pd5–O5  | 81.81(16)    | 80.93      |
| N4–Pd4–Se5  | 176.49(12)   | 177.58     | S6–Pd6–Se4 | 94.00(2)     | 95.14      |
| N4–Pd4–O4   | 81.78(16)    | 80.93      | O6–Pd6–Se6 | 168.78(11)   | 168.12     |
| N4–Pd4–Se4  | 88.04(12)    | 87.11      | O6–Pd6–Se4 | 97.18(11)    | 96.69      |
| Se5–Pd5–Se6 | 92.42(2)     | 95.14      | N6–Pd6–Se6 | 87.12(14)    | 87.22      |
| O5–Pd5–Se5  | 169.56(11)   | 168.03     | N6–Pd6–Se4 | 178.86(14)   | 176.96     |
| O5–Pd5–Se6  | 97.99(11)    | 96.77      | N6–Pd6–O6  | 81.70(17)    | 80.97      |

**Table S2:** Crystallographic parameters and refinement data for complex **1**.

|                                             |                                                                                                                                                                 |
|---------------------------------------------|-----------------------------------------------------------------------------------------------------------------------------------------------------------------|
| Empirical formula                           | $C_{60}H_{72}N_3O_3Pd_3Se_3$                                                                                                                                    |
| Formula weight                              | 1439.28                                                                                                                                                         |
| CCDC Number                                 | 2283578                                                                                                                                                         |
| Crystal habit, colour                       | Block, brown                                                                                                                                                    |
| Crystal size, $mm^3$                        | $0.35 \times 0.33 \times 0.31$                                                                                                                                  |
| Temperature, $T$                            | 100.00(13)                                                                                                                                                      |
| Wavelength, $\lambda$ (Å)                   | 0.71073                                                                                                                                                         |
| Crystal system                              | triclinic                                                                                                                                                       |
| Space group                                 | 'P -1'                                                                                                                                                          |
| Unit cell dimensions                        | $a = 14.0778(3)$ Å<br>$b = 15.5286(3)$ Å<br>$c = 31.7803(4)$ Å<br>$\alpha = 79.8730(10)^\circ$ ,<br>$\beta = 77.5150(10)^\circ$<br>$\gamma = 64.584(2)^\circ$ , |
| Volume, $V$ (Å <sup>3</sup> )               | 6099.4(2)                                                                                                                                                       |
| $Z$                                         | 4                                                                                                                                                               |
| Calculated density, $mg \cdot m^{-3}$       | 1.567                                                                                                                                                           |
| Absorption coefficient, $\mu$ ( $mm^{-1}$ ) | 2.709                                                                                                                                                           |
| $F(000)$                                    | 2868                                                                                                                                                            |
| $\theta$ range for data collection          | $2.6250^\circ$ to $28.5460^\circ$                                                                                                                               |
| Limiting indices                            | $-16 \leq h \leq 16$ , $-18 \leq k \leq 16$ ,<br>$-37 \leq l \leq 37$                                                                                           |
| Reflection collected/unique                 | 41832/21485 [ $R(int) = 0.0443$ ]                                                                                                                               |
| Completeness to $\theta$                    | 99.9% ( $\theta = 24.999^\circ$ )                                                                                                                               |
| Max. and min. transmission                  | 0.28840/1.00000                                                                                                                                                 |
| Refinement method                           | 'SHELXL-2018/3 (Sheldrick, 2018)'                                                                                                                               |
| Data/restraints/parameters                  | 21485/0/1333                                                                                                                                                    |
| Goodness-of-fit on $F^2$                    | 1.045                                                                                                                                                           |
| Final $R$ indices [ $I > 2\sigma(I)$ ]      | $R1 = 0.0473$ , $wR2 = 0.1126$                                                                                                                                  |
| $R$ indices (all data)                      | $R1 = 0.0594$ , $wR2 = 0.1192$                                                                                                                                  |
| Largest diff. peak and hole                 | 1.67 and $-1.54 e \cdot \text{Å}^{-3}$                                                                                                                          |

**Table S3.** Statistical measures and Weibull distribution results of the  $I_{SET}$  and  $I_{RESET}$  currents of different memristor devices.

| Parameters                       | Cu top electrode devices |           | Al top electrode devices |           |
|----------------------------------|--------------------------|-----------|--------------------------|-----------|
|                                  | $I_{RESET}$              | $I_{SET}$ | $I_{RESET}$              | $I_{SET}$ |
| Mean                             | 203 mA                   | 435 mA    | 241 mA                   | 368 mA    |
| Weibull Shape Factor ( $\beta$ ) | 4.8 & 29.2               | 22.7      | 24.7                     | 55.7      |

**Table S4:** Performance comparison of complex **1** as a memristor material with previously reported results for various molecular metal complexes found in the literature.

| Molecular Material                                    | RS type | RS Mechanism                                                                | Memory type | Endurance (cycles) | Retention (s) | SET/RESET Voltage     | Energy Cost/spike | Synaptic Actions/Pattern Recognition |
|-------------------------------------------------------|---------|-----------------------------------------------------------------------------|-------------|--------------------|---------------|-----------------------|-------------------|--------------------------------------|
| Ru complex <sup>1</sup>                               | Digital | Proton conduction                                                           | RAM*        | --                 | --            | + 1.5 V/<br>- 1.5 V   | --                | No/No                                |
| Iridium(III) complex <sup>2</sup>                     | Analog  | Interplay of charge transfer and redox activities                           | RAM         | --                 | 2000          | + 0.8 V/<br>- 1.2 V   |                   | Yes/No                               |
| Aluminum(III) (Alq3) complex <sup>3</sup>             | Digital | Filamentary                                                                 | WORM*       | --                 | 10000         | + 4 V/ --             | --                | No/No                                |
| Alkynylgold(III) complex <sup>4</sup>                 | Digital | Filamentary                                                                 | WORM        | --                 | 10000         | ± 5 V/ --             | --                | No/No                                |
| Platinum(II) complex <sup>5</sup>                     | Digital | Filamentary                                                                 | WORM        | --                 | 10000         | ± 5 V/ --             | --                | No/No                                |
| Ni(II)-tetraaza[14]annulene complex <sup>6</sup>      | Digital | Redox reaction modulated                                                    | RAM         | 500                | 18000         | +1.5 V/<br>- 1.5 V    | ~ 100 μJ          | No/No                                |
| Binuclear diradical cobalt(III) complex <sup>7</sup>  | Analog  | Ligand centred redox events                                                 | RAM         | 150                | 1200          | - 1.0 V/<br>+ 1.0 V   | --                | No/No                                |
| Azo anion diradical complexes of Rh(III) <sup>8</sup> | Digital | Schottky barrier modulated                                                  | RAM         | > 15               | >100          | + 2.75 V/<br>- 2.05 V | --                | No/No                                |
| Pd <sup>II</sup> <sub>3</sub> complex *               | Analog  | Redical centred redox activities and spin-polarized electronic transmission | RAM         | > 1300             | > 2100        | + 1.0 V/<br>- 1.0 V   | 7.63 nJ           | Yes/Yes                              |

<sup>+</sup> RAM – Random Access Memory and WORM – Write Once Read Many. \* This work

### Supporting References

1. Y. Hiruma, K. Yoshikawa and M. Haga, *Faraday Discussions*, 2019, **213**, 99–113.
2. Y. Zhuang, Y. Wang, Y. Deng, F. Li, X. Chen, S. Liu, Y. Tong and Q. Zhao, *Inorg. Chem.*, 2021, **60**, 13021–13028.

3. C.-L. Wong, M. Ng, E. Y.-H. Hong, Y.-C. Wong, M.-Y. Chan and V. W.-W. Yam, *J. Am. Chem. Soc.*, 2020, **142**, 12193–12206.
4. V. K.-M. Au, D. Wu and V. W.-W. Yam, *J. Am. Chem. Soc.*, 2015, **137**, 4654–4657.
5. A. K.-W. Chan, M. Ng, Y.-C. Wong, M.-Y. Chan\*, W.-T. Wong and V. W.-W. Yam, *J. Am. Chem. Soc.*, 2017, **139**, 10750–10761.
6. A. Sławek, L. Alluhaibi, E. Kowalewska, G. Abdi, T. Mazur, A. Podborska, K. Mech, M. Marciszko-Wiąckowska, A. Maximenko and K. Szaciłowski, *Adv. Electron. Mater.*, 2024, 2300818.
7. S. Sinha, M. S. E, R. Mondal, S. Das, L. T. Manamel, P. Brandão, B. de Bruin, B. C. Das and N. D. Paul, *J. Am. Chem. Soc.*, 2022, **144**, 20442–20451.
8. N. D. Paul, U. Rana, S. Goswami, T. K. Mondal and S. Goswami, *J. Am. Chem. Soc.*, 2012, **134**, 6520–6523.

### Optimized coordinates of complex 1

scf done: -3125.111836

|    |           |           |           |
|----|-----------|-----------|-----------|
| Pd | 9.059138  | 2.532369  | 11.032437 |
| Pd | 9.333601  | 5.294820  | 8.709021  |
| Pd | 6.127564  | 3.721684  | 9.290223  |
| Se | 7.216991  | 1.544349  | 9.659340  |
| Se | 10.484427 | 3.111077  | 9.106593  |
| Se | 7.532809  | 4.344234  | 7.318835  |
| O  | 8.156668  | 2.250836  | 12.894056 |
| O  | 10.622287 | 6.469112  | 9.857530  |
| O  | 4.986969  | 5.468048  | 9.337221  |
| N  | 4.895772  | 3.257766  | 10.848913 |
| N  | 8.469575  | 7.115947  | 8.400498  |
| N  | 10.547776 | 3.258049  | 12.224287 |
| C  | 5.897782  | 1.064008  | 11.044203 |
| C  | 4.845233  | 1.968446  | 11.365879 |
| C  | 10.142335 | 7.678733  | 10.002991 |
| C  | 5.957126  | -0.214972 | 11.602412 |
| H  | 6.802119  | -0.867972 | 11.359069 |
| C  | 4.214549  | 4.360470  | 11.314057 |
| C  | 6.842145  | 6.142237  | 6.898865  |

|   |           |           |           |
|---|-----------|-----------|-----------|
| C | 11.807713 | 3.541879  | 11.709919 |
| C | 10.789857 | 8.641252  | 10.858643 |
| C | 8.845062  | 2.837715  | 13.839408 |
| C | 7.490579  | 7.293380  | 7.430150  |
| C | 8.929319  | 8.062572  | 9.288388  |
| C | 10.119061 | 3.472692  | 13.514835 |
| C | 4.248591  | 5.511928  | 10.417453 |
| C | 8.367047  | 2.872029  | 15.199342 |
| C | 4.931393  | -0.664254 | 12.447014 |
| H | 4.982900  | -1.664869 | 12.888260 |
| C | 5.785914  | 6.253208  | 5.991480  |
| H | 5.286541  | 5.345719  | 5.635590  |
| C | 8.305262  | 9.306254  | 9.576686  |
| H | 7.330340  | 9.514182  | 9.144134  |
| C | 12.106630 | 8.283325  | 11.567600 |
| C | 10.779007 | 4.266313  | 14.492181 |
| H | 11.648910 | 4.845259  | 14.194626 |
| C | 11.959560 | 3.649004  | 10.297534 |
| C | 7.130246  | 8.552092  | 6.871514  |
| H | 7.698084  | 9.441641  | 7.149444  |
| C | 10.151973 | 9.864834  | 11.039488 |
| H | 10.617123 | 10.596852 | 11.702026 |
| C | 13.175578 | 7.883699  | 10.521604 |
| H | 12.848040 | 7.014044  | 9.934028  |
| H | 14.120838 | 7.620946  | 11.031748 |
| H | 13.376096 | 8.725464  | 9.833373  |
| C | 3.771606  | 1.456261  | 12.147543 |
| H | 2.882783  | 2.070514  | 12.301414 |
| C | 9.104948  | 3.614625  | 16.115603 |
| H | 8.744040  | 3.671251  | 17.144077 |
| C | 12.987751 | 3.666334  | 12.496483 |
| H | 12.941503 | 3.453509  | 13.565812 |
| C | 3.551794  | 4.462895  | 12.567171 |
| H | 3.653063  | 3.648536  | 13.279453 |
| C | 13.175893 | 4.022912  | 9.720904  |
| H | 13.242425 | 4.132551  | 8.633197  |
| C | 3.466321  | 6.679161  | 10.739091 |
| C | 5.385106  | 7.514299  | 5.526876  |
| H | 4.552358  | 7.599632  | 4.821282  |
| C | 10.288099 | 4.347222  | 15.788873 |
| C | 3.823556  | 0.167534  | 12.681103 |
| H | 2.982416  | -0.194755 | 13.282714 |
| C | 6.091740  | 8.654744  | 5.944841  |
| H | 5.835474  | 9.639264  | 5.537739  |
| C | 11.312851 | 4.312588  | 18.087322 |

|   |           |           |           |
|---|-----------|-----------|-----------|
| H | 10.419305 | 3.837171  | 18.527599 |
| H | 11.795503 | 4.916205  | 18.878246 |
| H | 12.011474 | 3.510342  | 17.788451 |
| C | 7.063380  | 2.151003  | 15.580309 |
| C | 14.303548 | 4.233757  | 10.527316 |
| H | 15.254013 | 4.533118  | 10.073906 |
| C | 8.899226  | 10.212526 | 10.445700 |
| C | 2.791197  | 6.678828  | 11.955818 |
| H | 2.212235  | 7.563903  | 12.225246 |
| C | 14.206356 | 4.013409  | 11.911809 |
| H | 15.094993 | 4.105997  | 12.546181 |
| C | 10.955851 | 5.206583  | 16.874587 |
| C | 2.839833  | 5.607934  | 12.901145 |
| C | 11.849479 | 7.104494  | 12.537529 |
| H | 11.102174 | 7.385139  | 13.302284 |
| H | 12.788632 | 6.829088  | 13.051578 |
| H | 11.479294 | 6.221806  | 11.997728 |
| C | 7.166720  | 0.649994  | 15.216054 |
| H | 6.227127  | 0.132431  | 15.484369 |
| H | 7.995101  | 0.173824  | 15.772377 |
| H | 7.338064  | 0.515594  | 14.138494 |
| C | 12.662655 | 9.463708  | 12.388035 |
| H | 12.871653 | 10.345133 | 11.754889 |
| H | 13.612632 | 9.160602  | 12.862973 |
| H | 11.972572 | 9.770124  | 13.195019 |
| C | 3.438888  | 7.881388  | 9.779988  |
| C | 2.498900  | 8.997335  | 10.276811 |
| H | 1.456125  | 8.645309  | 10.377622 |
| H | 2.502540  | 9.826659  | 9.547385  |
| H | 2.822704  | 9.410972  | 11.249120 |
| C | 0.625531  | 6.071065  | 14.004254 |
| H | 0.150012  | 5.243150  | 13.447973 |
| H | 0.478631  | 6.998055  | 13.423402 |
| H | 0.095561  | 6.191396  | 14.967362 |
| C | 2.124717  | 5.773329  | 14.251916 |
| C | 12.248687 | 5.881598  | 16.378395 |
| H | 12.995177 | 5.137942  | 16.045681 |
| H | 12.701539 | 6.465678  | 17.199093 |
| H | 12.054934 | 6.574604  | 15.542344 |
| C | 4.866686  | 8.470684  | 9.672120  |
| H | 4.866417  | 9.334739  | 8.982436  |
| H | 5.575456  | 7.723527  | 9.288781  |
| H | 5.221789  | 8.813606  | 10.661289 |
| C | 5.887142  | 2.803165  | 14.813458 |
| H | 6.031862  | 2.725850  | 13.726940 |

|   |           |           |           |
|---|-----------|-----------|-----------|
| H | 5.795995  | 3.872590  | 15.078158 |
| H | 4.939971  | 2.296694  | 15.075142 |
| C | 2.767344  | 6.953298  | 15.021787 |
| H | 2.688778  | 7.899569  | 14.458322 |
| H | 3.838772  | 6.757658  | 15.208148 |
| H | 2.264994  | 7.096849  | 15.996710 |
| C | 2.945826  | 7.428831  | 8.384163  |
| H | 1.920770  | 7.019859  | 8.450784  |
| H | 3.608621  | 6.660611  | 7.960758  |
| H | 2.929810  | 8.291796  | 7.692935  |
| C | 6.764769  | 2.253992  | 17.088898 |
| H | 5.831682  | 1.707073  | 17.312610 |
| H | 6.620193  | 3.300462  | 17.413406 |
| H | 7.569325  | 1.807248  | 17.700953 |
| C | 8.249673  | 11.558206 | 10.806712 |
| C | 2.224969  | 4.510941  | 15.129147 |
| H | 1.676661  | 4.670637  | 16.074467 |
| H | 3.270832  | 4.271534  | 15.385646 |
| H | 1.781175  | 3.630925  | 14.629572 |
| C | 9.230337  | 12.707652 | 10.468312 |
| H | 8.776695  | 13.684016 | 10.720959 |
| H | 9.474920  | 12.707414 | 9.390731  |
| H | 10.176337 | 12.622650 | 11.030568 |
| C | 9.968494  | 6.313646  | 17.319200 |
| H | 9.702402  | 6.962307  | 16.465156 |
| H | 10.424270 | 6.943482  | 18.105958 |
| H | 9.034140  | 5.888328  | 17.725605 |
| C | 7.934068  | 11.575353 | 12.322696 |
| H | 7.470583  | 12.537926 | 12.609207 |
| H | 8.846111  | 11.444799 | 12.931154 |
| H | 7.233672  | 10.761198 | 12.582632 |
| C | 6.938014  | 11.802843 | 10.036478 |
| H | 6.175002  | 11.042091 | 10.273493 |
| H | 7.100577  | 11.800790 | 8.943531  |
| H | 6.523946  | 12.789183 | 10.311179 |
